# Supplementary material for: LMP1 Up-regulates Calreticulin to Induce Epithelial-mesenchymal Transition via TGF-β/Smad3/NRP1 Pathway in Nasopharyngeal Carcinoma Cells
Source: PubMed Central journal article supplement (PMC6959064; doi:10.7150/jca.37415), 2020-01-01
Supplement: jcav11p1257s1.pdf [file jcav11p1257s1.pdf]

Supplementary Table 1

>5' Flanking sequence chromosome:GRCh38:10:33336263:33338262:-1

CTTGCATGACACAGTCACTTGACAGAATAACCACTAATAGGCTTATTTT  
AAACATTAGTTAATTAATAAATTCCAACCTTTAATGTTTTTCCAGTTTCACTTCA  
TCTATTCATACATCTCAAAACTAGGTTAGCTCCTACTAAAAATATGGAGCTT  
GTATTGCTTTTCTGAAATTTATGGGTTTGATGTTTTTCAAAAACTTGACTAG  
ATATGATGCAGTTTGAACCTACCAACCCGAATCTCCATATTGCATGAATCTGA  
AGTACTTTGAGGGAGTTAGTGGCTCAAATGGCCTTCTGGGAGCAATCGATT  
TCATCTATTTCTGACAAAGGGATGAGAGCTTGATGAAAGGAATCGAGCAGT  
TACCATCCAGTCTACTCTTACTGATGGGCCACGGTTCCAATCCGACTCAGGGA  
GCCCCAGCTGAAGGCCTTATTTCTGCAGCACCTCCTAAGTGGGAGTCCAGGAA  
ACTGGGCTTTGCCACTCACAGCCTCTGCAGGGCGTTCTGGGGGTGCGGTAG  
AGGACTCTTCCCTTCCCTGGAACTGGGTCCTACCAAGTCCAGGGATTTGTTCTA  
TCAGGAAGAATAATGTGTTCAAGAGACCAAATAAAAATCAACCCGGGAACAC  
TGCCAAATTCTTCCCTCTGCCTATCACTTATTCTCGTATAGAGCCGGCCTGTCTCC  
ACGCTGGGGAATTGCAAAAATCTAAACTGACCCCTCTCACCACTTAGTGGAA  
TCCAACAGCAAAGGAAAAAGGTTGTTAGCAAGGACAATTTGCTCTGTACCAA  
CCCCTGGCCGGAATTCTCAATCAGTGCAGTGGGCTCCATTACCCAGCACT  
GTGAGTGGAACTAAGGAGTCTAGAAAAACCTTAGATCAGCTAAGAGCAGA  
GAAATCAGAGGCAGAACTTAAATATGACATTTCCCTTCTGAGTCCATAGTGCATC  
CCTTATTCACTGGTTGGAGAAAGCTGGCAAAGCGCTCAGCTGGAGGCAGGC  
GTTTTCTGTGCGTTGAGGCGCCGGAGGAGCCATTCCCTTCGGGAAAGACAAG  
GTCGGGGTGGGGGCAGTCGCTCCGGAGTGCACGATCCGGTGGCTTTATTTGCT  
GGCCTGGCGGGTCTAGGCTGGAAAATGCACACTCAGCAGGGAAAGGGGAAG  
AGAGATTGGCGGCAGTTTTCTAAAAACAACACAGCTCAAGTCTCCCTCGTGTG  
CCCCCTCGCTACCCCGCCGAGGCTCAGAGCTATCCAAACGGGCGCTCCGGA  
GCGAGCGCGGAGGTTCGGGTCCCCCAGGACGCAGGCGGGCCTCCGAGACTC  
CAGGCCGCCCCGCGCCGCTCCCTCCCGGTTCCCTTCCCTGTCAACCTGCC  
AGGTCCTGAGAGGCGCCTCTCCCTCCGAGCCTGGACCGAGGTCGCTCCGGGT  
CACCTAAATCTGATGATGCCGCTCGCCCGGCGCAGCCGGGGGCTGGGACTGG  
CGGGGCTGCACCTGGGGAGGCGGCGACCGCGCGCGGGTAGTAGCCGAGAGC  
CCAGGCTGCCTCTGCGGCGCTCACTCCCCGGGGTCTGCGCTGGGCGCGGTC  
GGCGCCCCGCTCGCCTCCCGCCTGCCCGCCTGCCCGGGCGCAGGGCTGCC  
CATGGCTTCGACAGTGCTCCTTCCGCTCAACTTAGGCATTTAACTCCCAGCCCT  
TCGGTGCCCACTTCCCACCCCGCGCCTCCCAGGGGTCCGACAGCTGAGAAGA  
AGGAGGAAACTGGCAGAGGAAAGAGGCGCTCGGGGGGGCCGAGTTTCCAAC  
TTGGCGACTGGGAATCCCGAGGCGCGTGGGGAGGAGAAGACAGGCTTGACC

CGGGGCAAGAGAGTGGCGAGTGC GGGCTCCGTGGGTGCACCTCCC ACTGGCC  
CGGGAACGGCCTGCACCCCGAGGGGCGCACGTC ACTGCTCCCAGCCCGAGTC  
GCGAGCGCGCAGTCCTGGCCTGGGGCCCGCGCGCCTTGGGCTTCTCCCTGCC  
CGCCCTTTTTCTTCC
